# Supplementary material
Source: PubMed Central journal article supplement (PMC9632759)
Supplement: bloodBLD2021012976-suppl1.pdf [file bloodBLD2021012976-suppl1.pdf]

Figure 3B

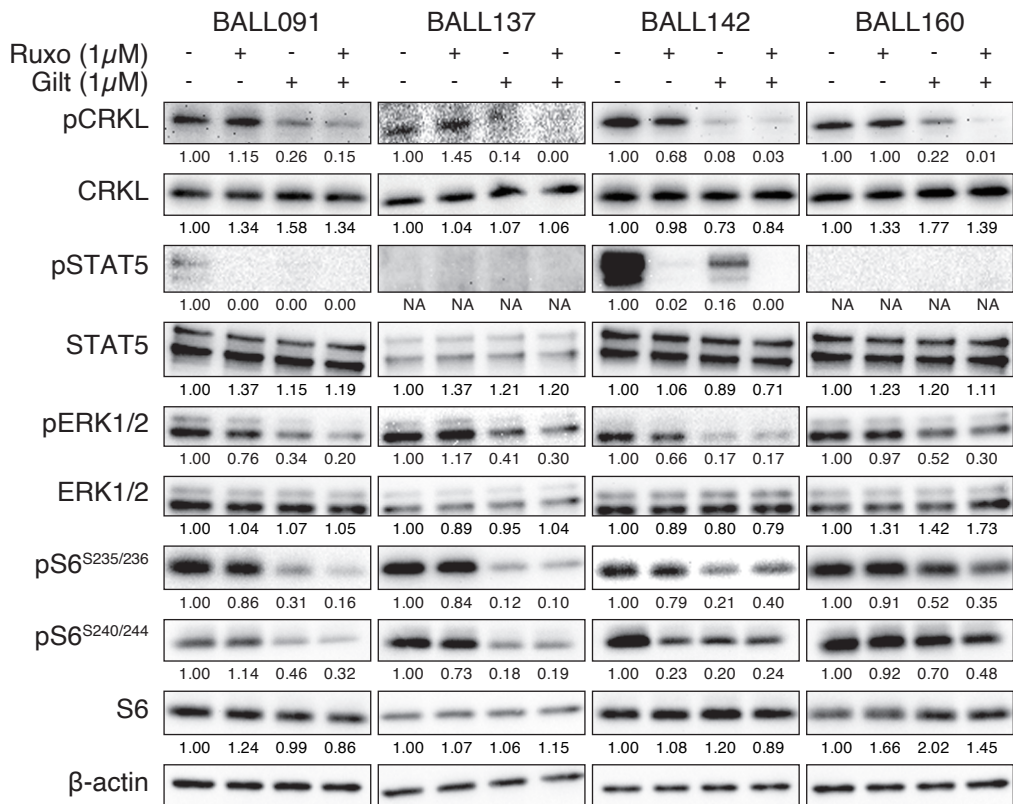

Figure 5B

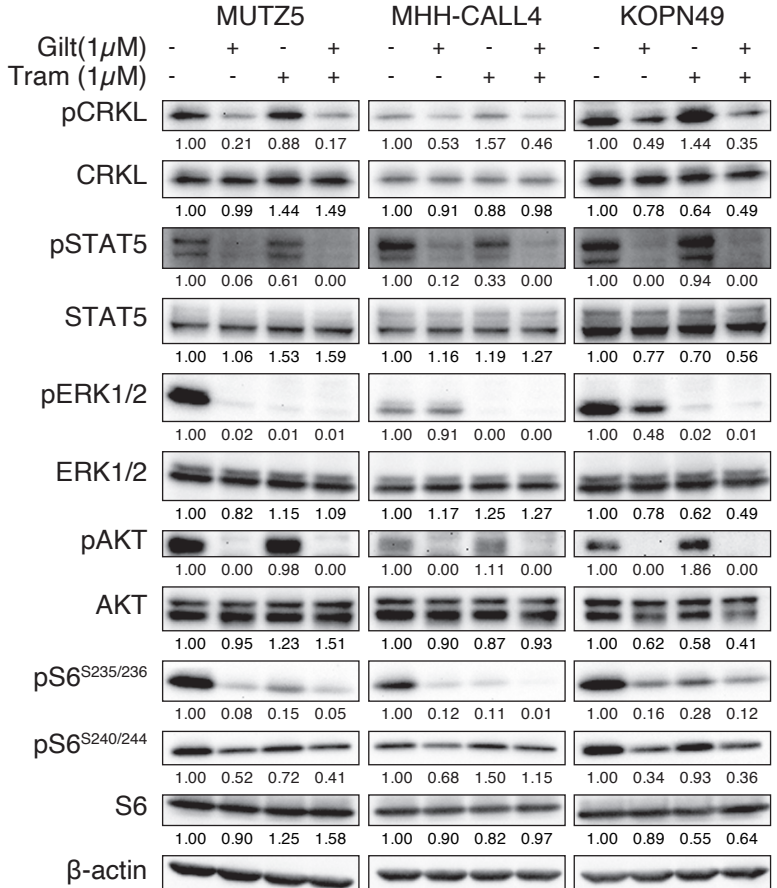

**Supplemental Figure 1.** Quantification of Western Blot signals. Densitometric analysis of western blot signal intensity was performed using ImageJ software. Protein amount of target protein was normalized to that of  $\beta$ -actin in each sample. The amount of the phosphorylated form of target protein was normalized to that of its total protein.

## Supplemental Figure 2

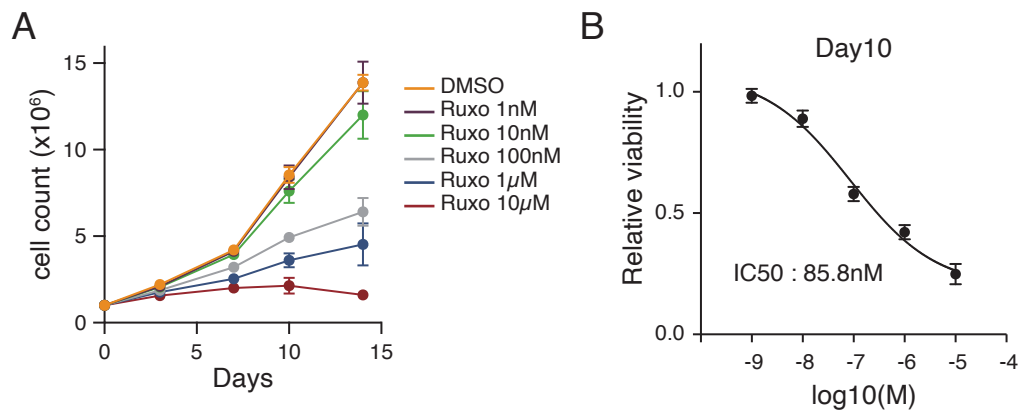

**Supplemental Figure 2.** Growth curve of MUTZ5 cells in the presence of Ruxolitinib. **(A)** Growth curves were generated at various Ruxolitinib concentrations. Each condition was assessed in triplicate, and data are represented as means  $\pm$  SD. **(B)** An IC<sub>50</sub> value was calculated based on assessment for viability 10 days after Ruxolitinib treatment.

# Supplemental Figure 3

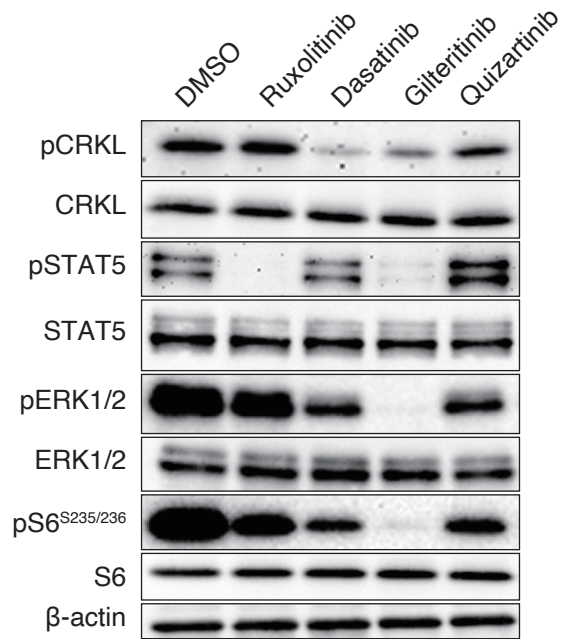

**Supplemental Figure 3.** pCRKL levels upon FLT3i/TKI treatment (1  $\mu$ M, 2 h) in MUTZ5 cells. Gilteritinib, but not Quizartinib, significantly reduced pCRKL levels. Dasatinib serves as control.

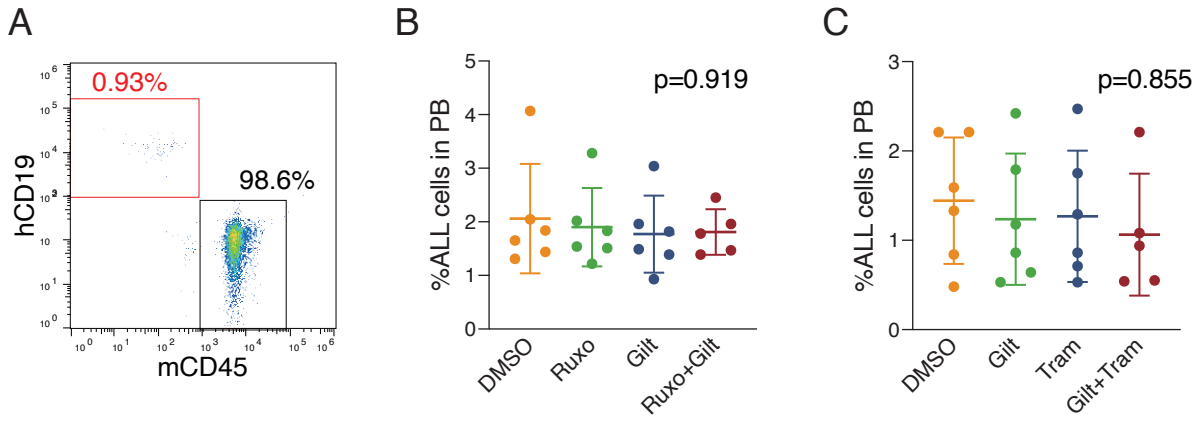

**Supplemental Figure 4.** ALL cell engraftment in PB. **(A)** Representative FACS profile of PB 30 days after transplantation. **(B)** Proportions of human ALL cells in PB 30 days after transplantation in each experimental group (related to Figure 4). **(C)** Proportions of human ALL cells in PB 30 days after transplantation in each experimental group (related to Figure 5).
